# Supplementary material
Source: Springer Nature journal article supplement (https://www.springermedizin.de/resource/supplementary/12889_2010_2920_MOESM1_ESM.pdf/9487666)

1a.

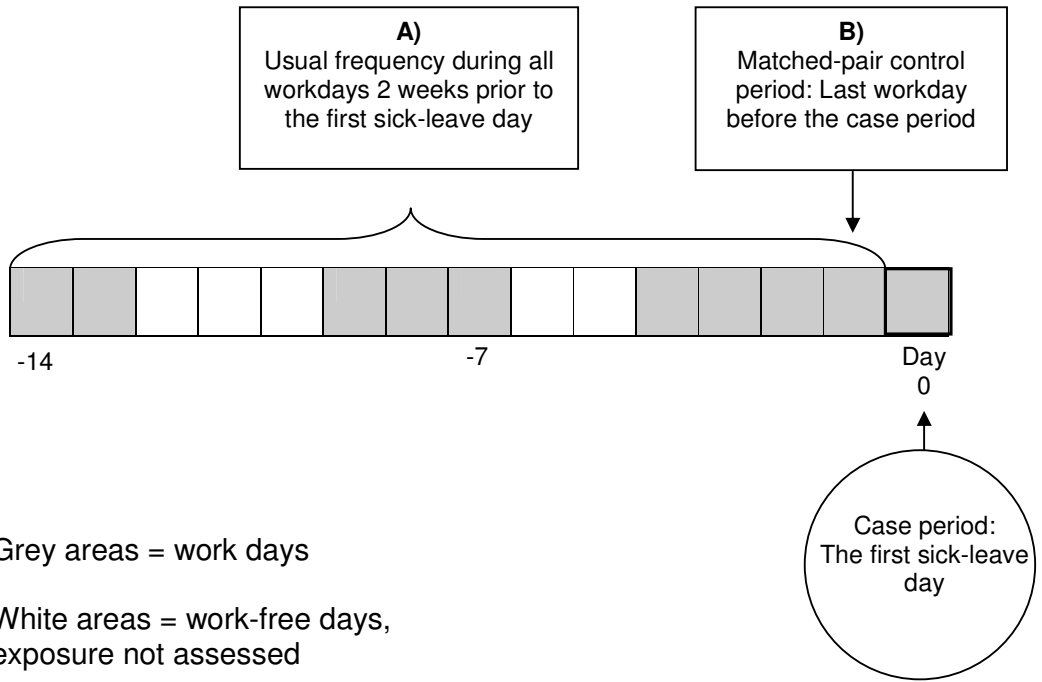

1b.

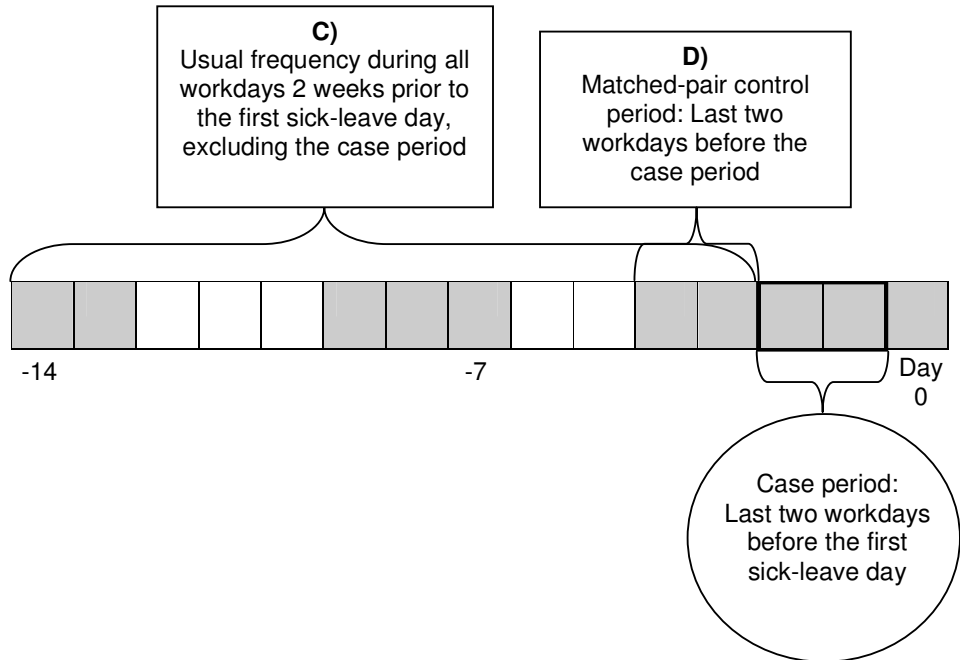

Supplement: MOESM1 [file 9487666]
